# Supplementary material for: Combined Effect of Genetic Variants on Long-Term Weight Response after Bariatric Surgery
Source: MDPI journal article supplement (doi:10.3390/jcm12134288), 2023-06-26
Supplement: s1 [file s1]

## Supplementary Material

**Table S1.** Genotype association study: Akaike Information Criterion (AIC) value for each model. Variants with significant association with weight response variables.

| Association |                       | AIC value for each model |               |               |               |
|-------------|-----------------------|--------------------------|---------------|---------------|---------------|
| Gene        | SNP-Phenotype         | Co-dominant              | Dominant      | Recessive     | Log-additive  |
| GIPR        | 10423928 - %TWL_nadir | 1814.2                   | <b>1812.7</b> | 1821.5        | 1814.6        |
|             | 10423928 - %TWL_6y    | 1929.7                   | <b>1928.1</b> | 1934.5        | 1929.5        |
| DPPIV       | 1861975 - %TWL_nadir  | 2611.9                   | 2614.4        | <b>2610.2</b> | 2613.6        |
|             | 1861975 - %TWL_6y     | 2764.7                   | 2767.6        | <b>2762.8</b> | 2765.9        |
| NPY1R       | 9764 - %TWL_nadir     | 1804.5                   | 1806.5        | <b>1802.5</b> | 1805.5        |
| NPY5R       | 11100493 - %TWL_6y    | 2768.5                   | 2771.9        | <b>2767.5</b> | 2772.3        |
| CLOCK       | 1801260 - %TWL_6y     | 2808.7                   | 2809          | 2808.2        | <b>2807.4</b> |
|             | 1801260 - %WR_MWL     | 3239.6                   | 3238.4        | 3240          | <b>3237.6</b> |
| GLP1R       | 10305439 - %TWL_6y    | 2771.6                   | <b>2771.2</b> | 2776.7        | 2775.7        |
|             | 10305439 - %WR_MWL    | 3170.1                   | <b>3170</b>   | 3175.7        | 3174.3        |
|             | 2143734 - %TWL_6y     | 2797.2                   | 2797.1        | 2796.7        | <b>2795.5</b> |
|             | 877446 - %WR_MWL      | 3222.5                   | <b>3220.7</b> | 3224.5        | 3223          |

AIC, Akaike Information Criterion. In bold highlighted the AIC with the lowest value for each association.
